# Supplementary material for: A simple and effective method for controllable synthesis of silver and silver oxide nanocrystals
Source: Royal Society of Chemistry journal article supplement (doi:10.1039/c4ra02882a), 2014-01-01
Supplement: c4ra02882a1.pdf [file c4ra02882a1.pdf]

Electronic Supplementary Information

## A simple and effective method for controllable synthesis of silver and silver oxide colloidal nanocrystals

Jacqueline E. Cloud,<sup>a</sup> Lauren W. Taylor,<sup>a</sup> and Yongan Yang<sup>a\*</sup>

<sup>a</sup>Department of Chemistry and Geochemistry, Colorado School of Mines, 1500 Illinois Street, Golden CO, USA

**Table S1.** Standard reduction potentials of the elements studied by AVIES.<sup>1,2</sup>

| Metal | Reaction                                                                                                | E°<br>vs. E°H <sup>+</sup> /H <sub>2</sub> | Products                   |
|-------|---------------------------------------------------------------------------------------------------------|--------------------------------------------|----------------------------|
| Au    | $\text{Au}^{3+} + 3\text{e}^- \rightleftharpoons \text{Au}^0$                                           | 1.50                                       | Au <sup>0</sup> NCs        |
|       | $\text{Au}^+ + \text{e}^- \rightleftharpoons \text{Au}^0$                                               | 1.41                                       |                            |
| Pt    | $\text{Pt}^{2+} + 2\text{e}^- \rightleftharpoons \text{Pt}^0$                                           | 1.18                                       | Pt <sup>0</sup> NCs        |
|       | $\text{PtO}_2 + 4\text{H}^+ + 4\text{e}^- \rightleftharpoons \text{Pt}^0 + 2\text{H}_2\text{O}$         | 0.92                                       |                            |
| Pd    | $\text{Pd}^{2+} + 2\text{e}^- \rightleftharpoons \text{Pd}^0$                                           | 0.915                                      | Pd <sup>0</sup> NCs        |
|       | $\text{PdO} + 2\text{H}^+ + 2\text{e}^- \rightleftharpoons \text{Pd}^0 + \text{H}_2\text{O}$            | 0.79                                       |                            |
| Ag    | $\text{Ag}^+ + \text{e}^- \rightleftharpoons \text{Ag}^0$                                               | <b>0.799</b>                               | <b>Ag<sup>0</sup> NCs</b>  |
|       | $\text{Ag}_2\text{O} + \text{H}_2\text{O} + 2\text{e}^- \rightleftharpoons 2\text{Ag}^0 + 2\text{OH}^-$ | <b>0.342</b>                               | <b>Ag<sub>2</sub>O NCs</b> |
| Cu    | $\text{Cu}^{2+} + 2\text{e}^- \rightleftharpoons \text{Cu}^0$                                           | 0.340                                      | Cu <sub>2</sub> O NCs      |
|       | $\text{Cu}_2\text{O} + \text{H}_2\text{O} + 2\text{e}^- \rightleftharpoons 2\text{Cu}^0 + 2\text{OH}^-$ | -0.530                                     |                            |
| Sn    | $\text{Sn}^{2+} + 2\text{e}^- \rightleftharpoons \text{Sn}^0$                                           | -0.141                                     | Sn NCs                     |
|       | $\text{SnO}_2 + 4\text{H}^+ + 4\text{e}^- \rightleftharpoons \text{Sn}^0 + 2\text{H}_2\text{O}$         | -0.118                                     |                            |
| Ni    | $\text{Ni}^{2+} + 2\text{e}^- \rightleftharpoons \text{Ni}^0$                                           | -0.236                                     | NiO NCs and Ni(OH) NCs     |
|       | $\text{Ni(OH)}_2 + 2\text{e}^- \rightleftharpoons \text{Ni}^0 + 2\text{OH}^-$                           | -0.714                                     |                            |
|       | $\text{NiO} + \text{H}_2\text{O} + 2\text{e}^- \rightleftharpoons \text{Ni}^0 + 2\text{OH}^-$           | -0.686                                     |                            |
| Cd    | $\text{Cd}^{2+} + 2\text{e}^- \rightleftharpoons \text{Cd}^0$                                           | -0.4025                                    | CdO NCs                    |
|       | $\text{CdO} + \text{H}_2\text{O} + 2\text{e}^- \rightleftharpoons \text{Cd}^0 + 2\text{OH}^-$           | -0.8232                                    |                            |
| Zn    | $\text{Zn}^{2+} + 2\text{e}^- \rightleftharpoons \text{Zn}^0$                                           | -0.762                                     | ZnO NCs                    |
|       | $\text{ZnO} + \text{H}_2\text{O} + 2\text{e}^- \rightleftharpoons \text{Zn}^0 + 2\text{OH}^-$           | -1.590                                     |                            |
| Ti    | $\text{Ti}^{2+} + 2\text{e}^- \rightleftharpoons \text{Ti}^0$                                           | -1.60                                      | TiO <sub>2</sub> NCs       |
|       | $\text{TiO}_2 + 4\text{H}^+ + 4\text{e}^- \rightleftharpoons \text{Ti}^0 + 2\text{H}_2\text{O}$         | -1.076                                     |                            |

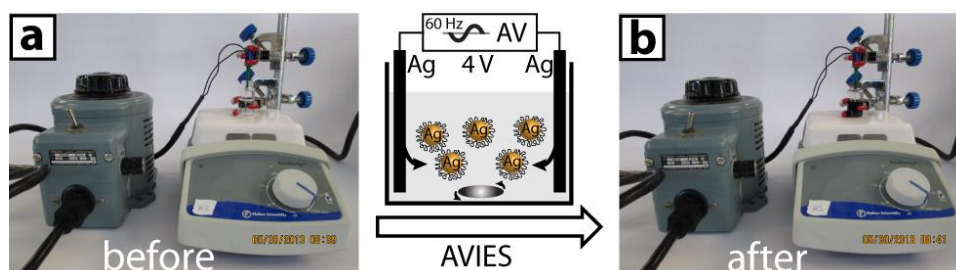

**Fig. S1** Illustration of the AVIES method for synthesizing Ag-based NCs: before (a) and after (b) the reaction.

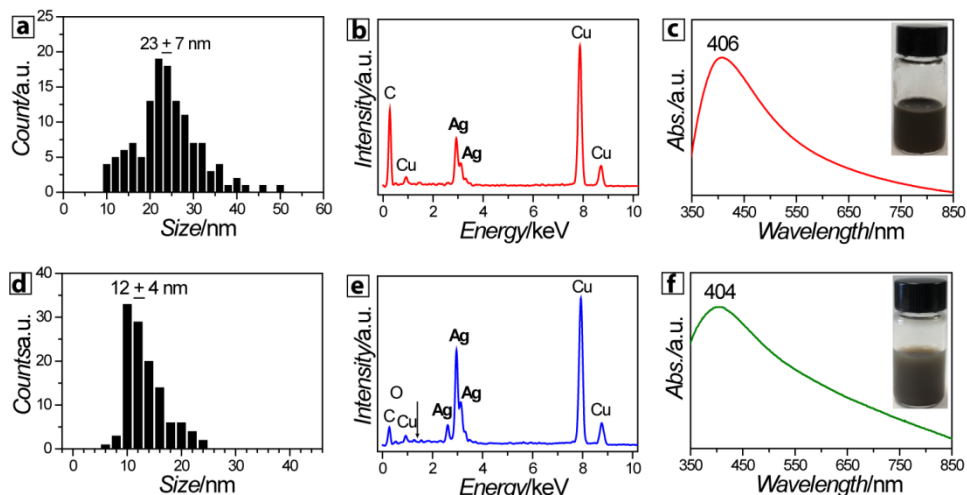

**Fig. S2** (a) Histogram showing the size distribution of Ag nanocrystals shown in Fig. 1(d) (NaBr, no stirring); (b) EDX of Ag nanocrystals shown in Fig. 1(d); (c) UV-Vis absorption spectrum of Ag nanocrystals in Fig. 1(d); (d) Histogram showing the size distribution of Ag-Ag<sub>2</sub>O nanocrystals in Fig. 1(f) (KNO<sub>3</sub>, no stirring); (e) EDX of Ag-Ag<sub>2</sub>O nanocrystals in Fig. 1(f); and (f) UV-Vis absorption spectrum of Ag-Ag<sub>2</sub>O nanocrystals in Fig. 1(f).

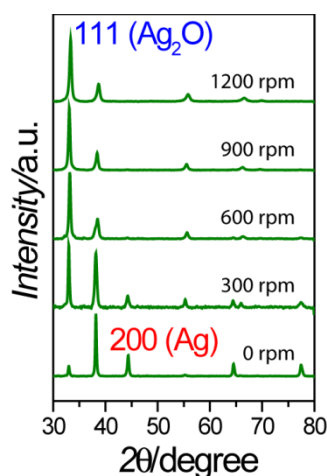

**Fig. S3** XRD profiles of the products obtained from KNO<sub>3</sub> solutions by using different stirring rates of 0 – 1200 rpm.

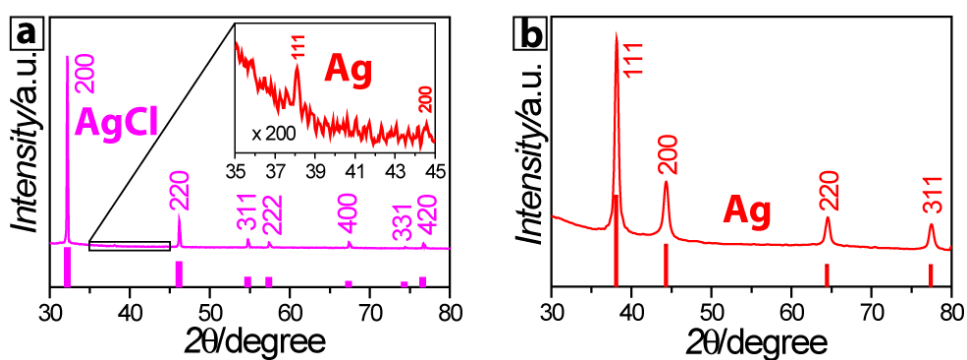

**Fig. S4** XRD profiles of the products obtained from KCl (a) and NaBr (b) solutions by using the stirring rate of 1200 rpm.

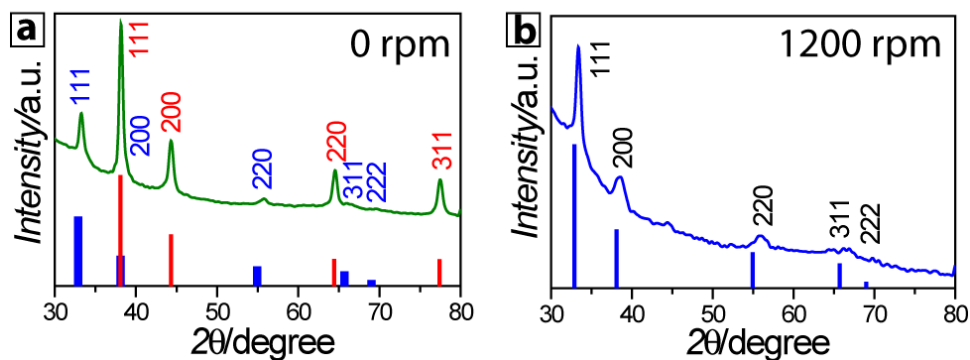

**Fig. S5** XRD profiles of the obtained Ag-Ag<sub>2</sub>O nanocrystals (a) and Ag<sub>2</sub>O nanocrystals (b) from K<sub>2</sub>SO<sub>4</sub> solutions, by using different stirring rates of 0 rpm (a) and 1200 rpm (b), respectively.

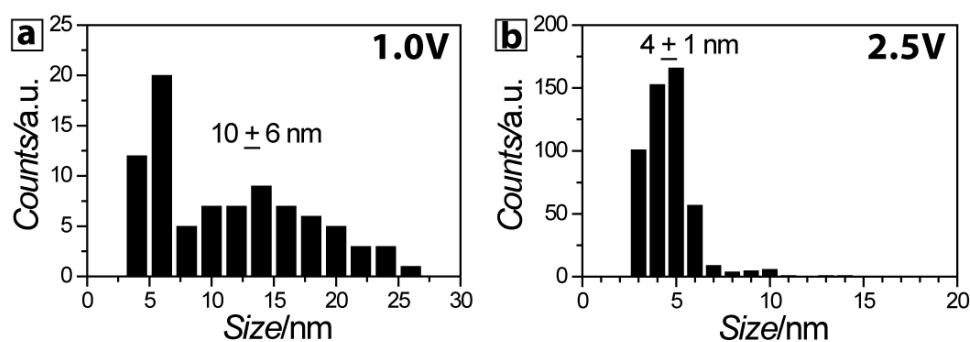

**Fig. S6** Histograms of the nanocrystals shown in Fig. 4(b) (a) and Fig. 4(d) (b), of which the voltages are 1.0 V and 2.5 V, respectively.

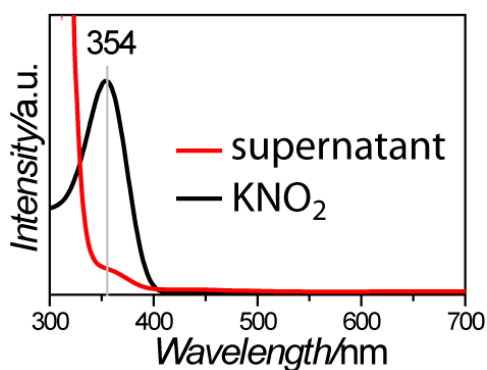

**Fig. S7** UV-Vis absorption spectra of the supernatant of the KNO<sub>3</sub> reaction solution using 4.0 V (red) and a standard KNO<sub>2</sub> solution (black).

## References

1. D. C. Harris, *Quantitative Chemical Analysis*, W.H. Freeman, New York, 8th edn., 2010.
2. A. J. Bard and L. R. Faulkner, *Electrochemical methods: fundamentals and applications*, John Wiley and Sons Inc., 2nd edn., 2001.
